# Supplementary material for: Retrieval of diurnal properties of aerosol and surface from geostationary satellite Himawari-8 using multi-pixel approach
Source: Copernicus journal article supplement (doi:10.5194/egusphere-2025-2694), 2025-06-24
Supplement: Supplementary file 1 [file egusphere-2025-2694-supplement.pdf]

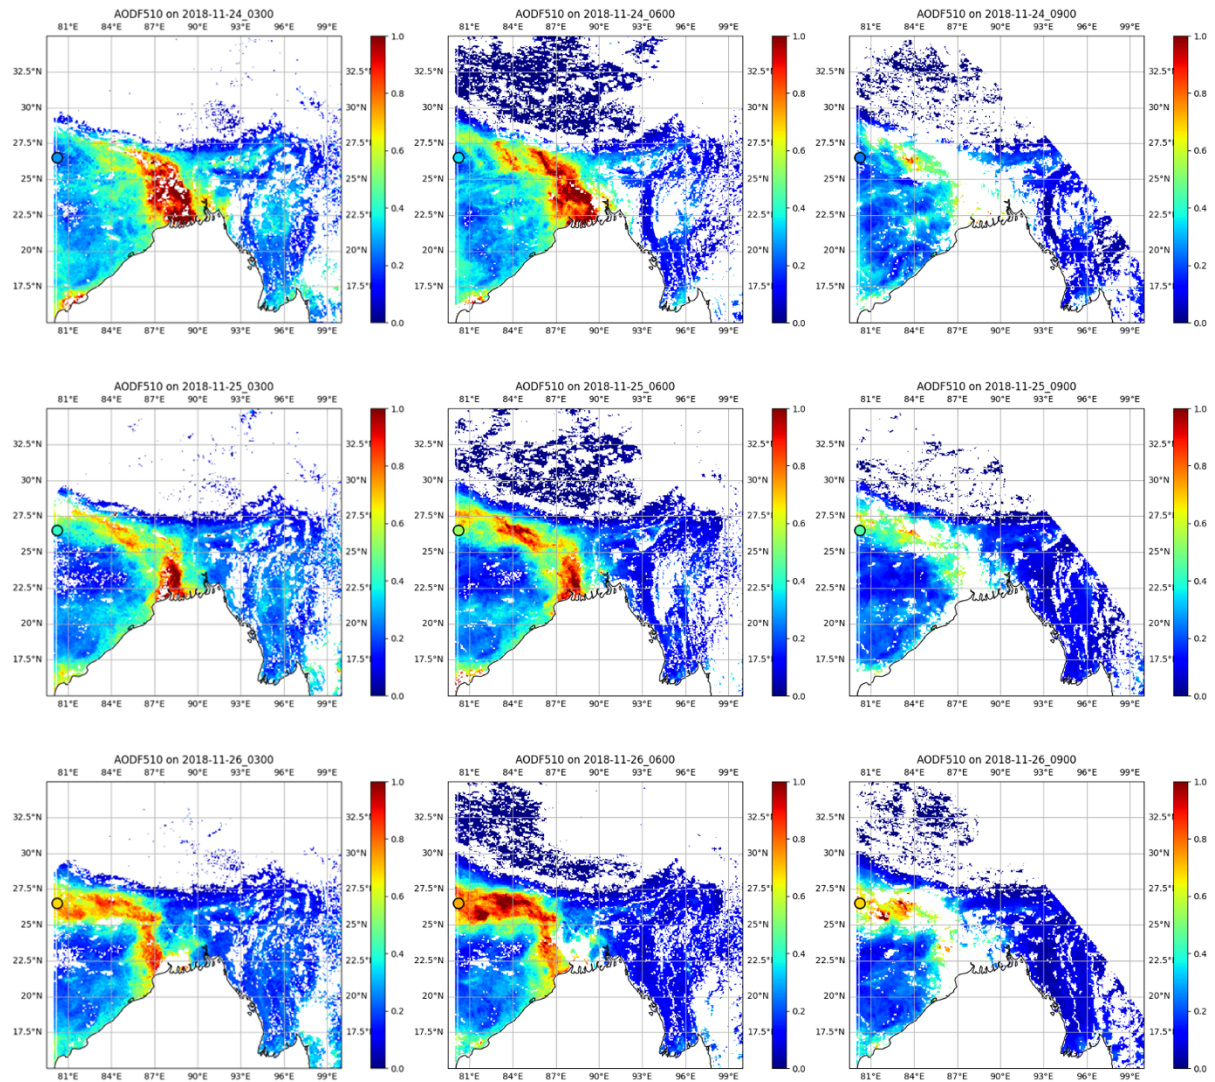

**Figure S1: AHI/GRASP AOD510 nm distribution for the pollution event during 24<sup>th</sup> – 26<sup>th</sup> November, 2018. The AERONET site Kanpur (India) is marked with a black circle.**

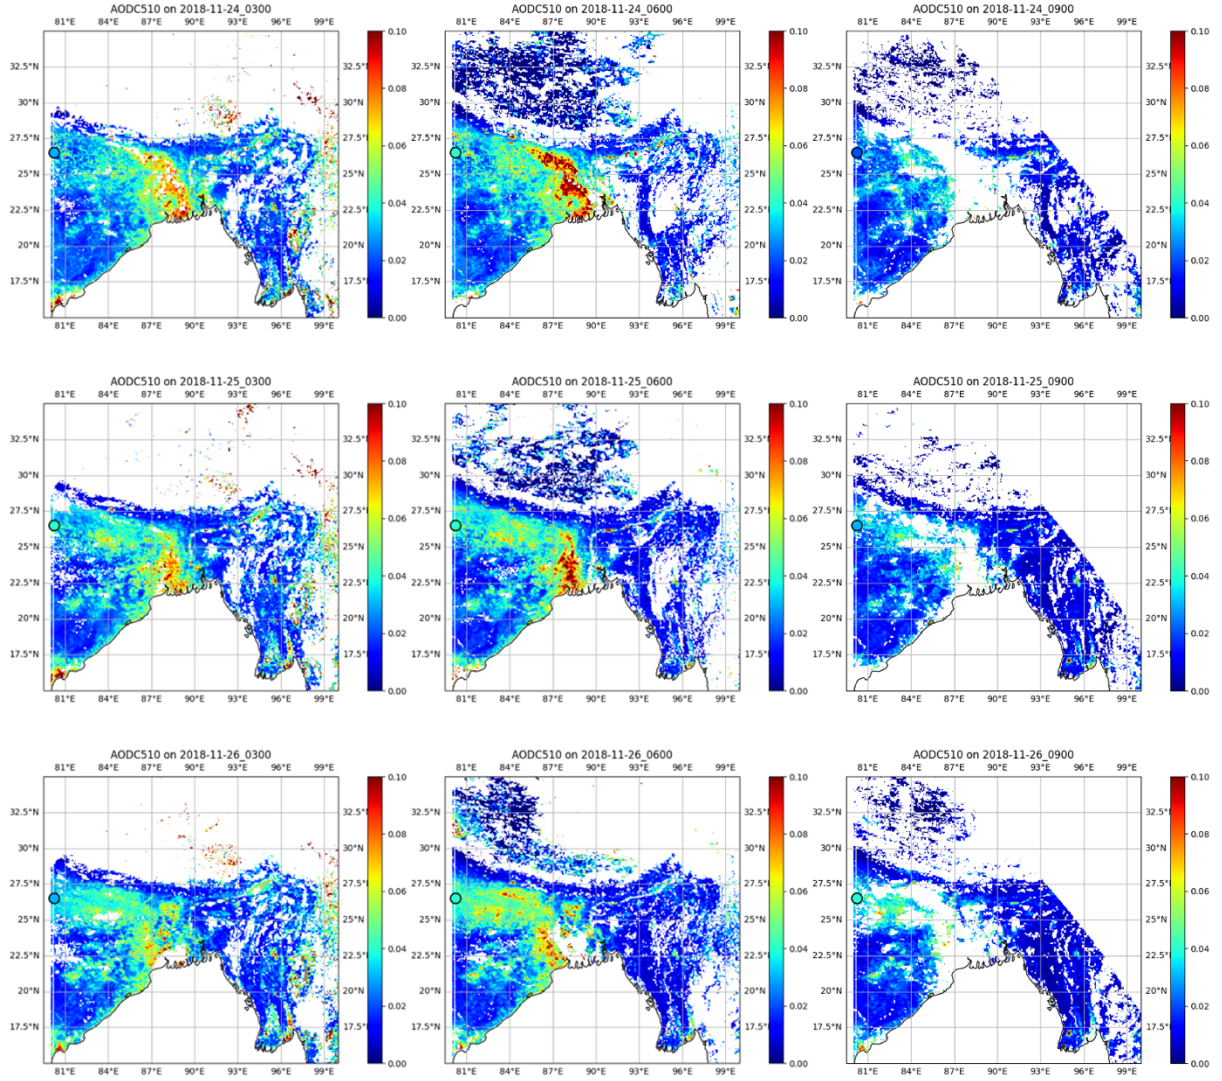

**Figure S2: AHI/GRASP AODC510 nm distribution for the pollution event during 24th – 26th November, 2018. The AERONET site Kanpur (India) is marked with a black circle.**

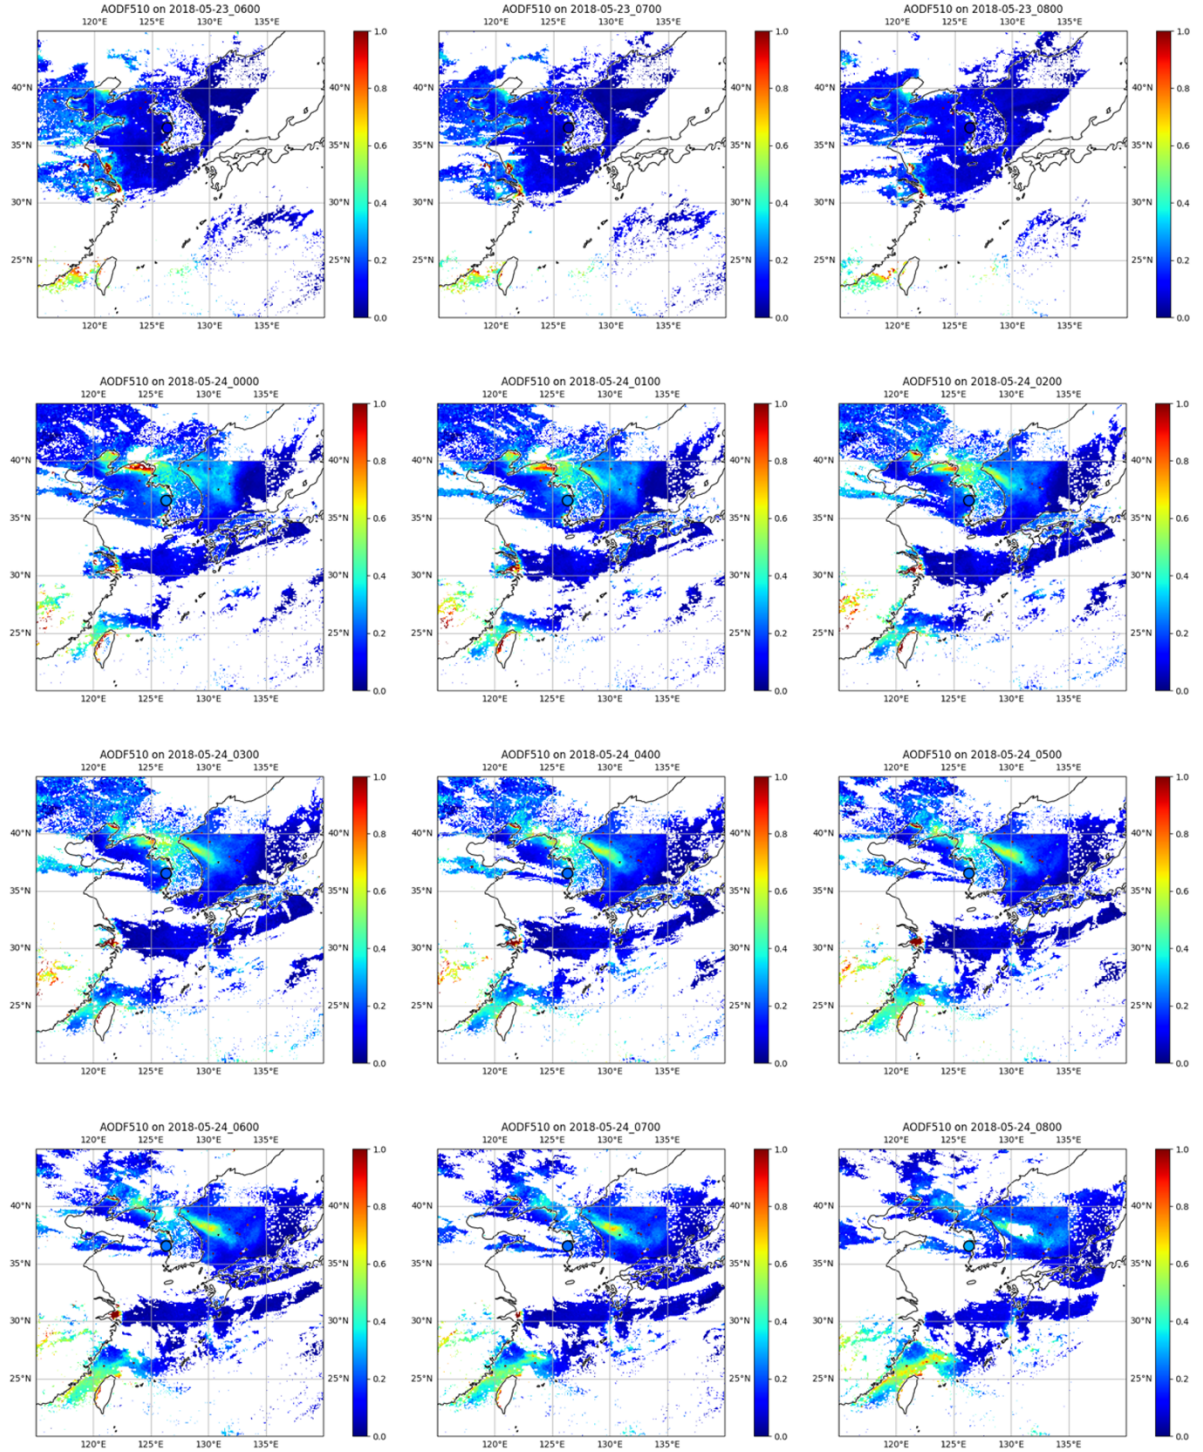

**Figure S3: AHI/GRASP AOD510 nm distribution for the pollution event during 23rd-24th May, 2018. The AERONET site Anmyon (South Korea) is marked with a black circle.**

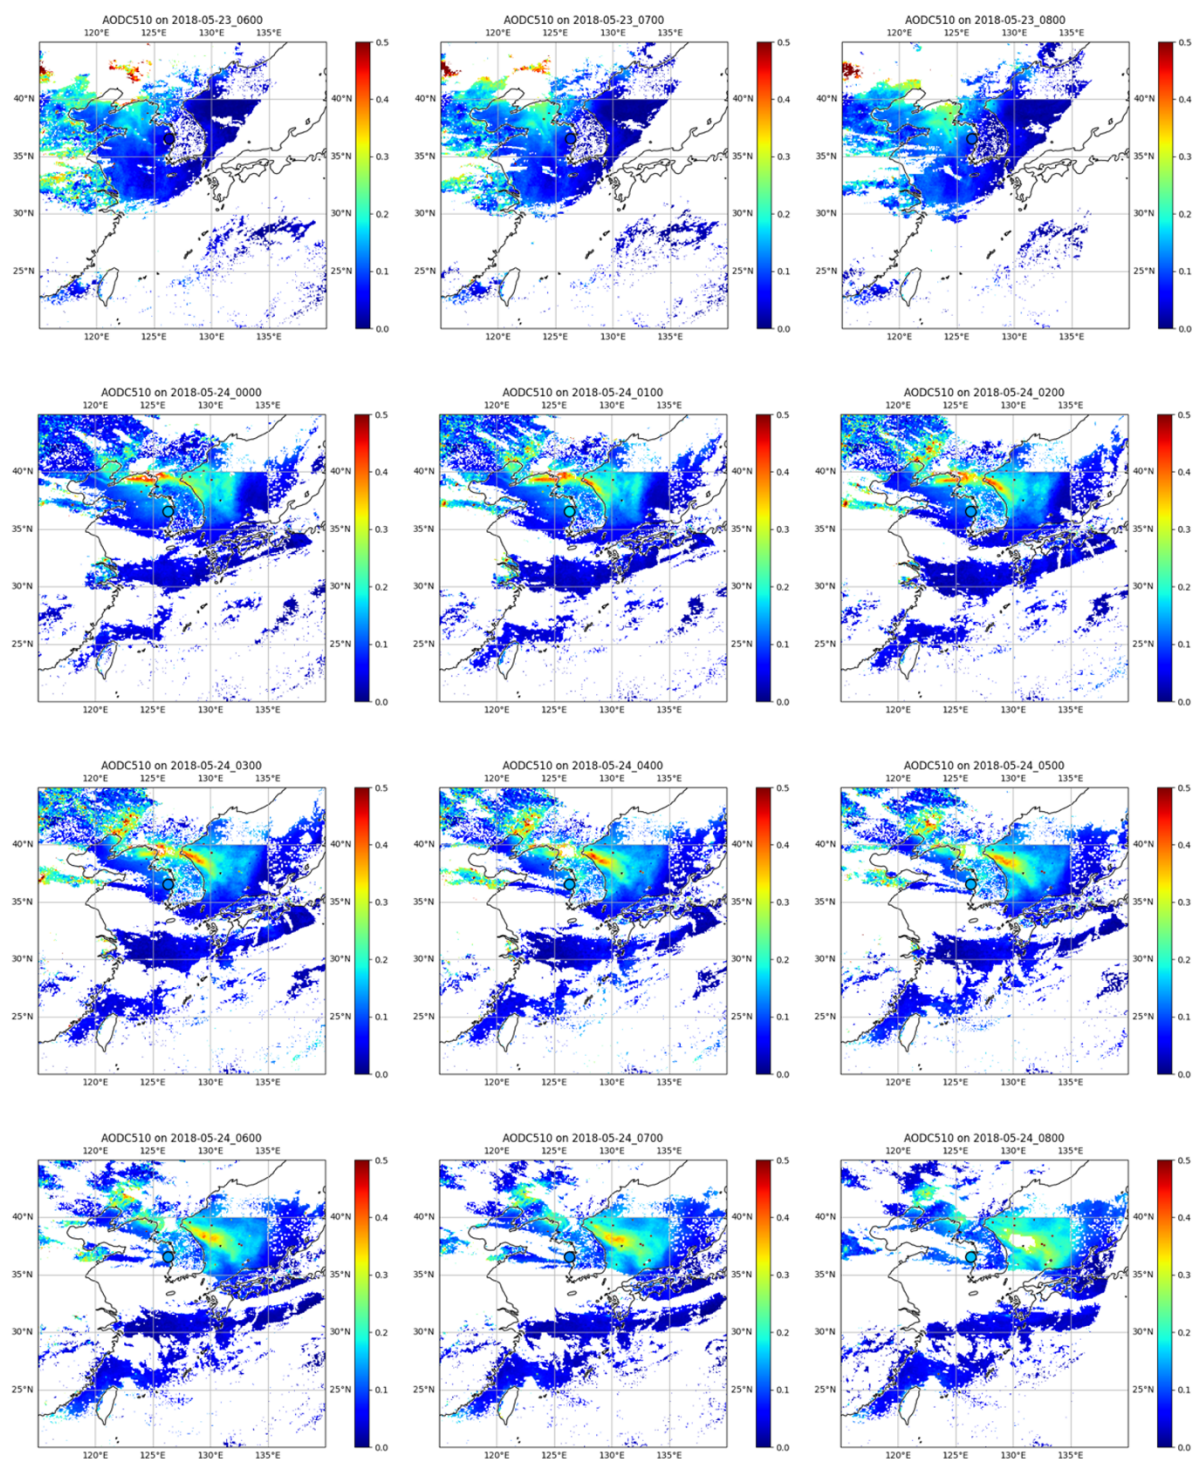

**Figure S4: AHI/GRASP AODC510 nm distribution for the pollution event during 23rd-24th May, 2018. The AERONET site Anmyon (South Korea) is marked with a black circle.**
